# Supplementary material
Source: PubMed Central journal article supplement (PMC1754633)
Supplement: annrheumd_62_8_741__2.pdf [file annrheumd_62_8_741__2.pdf]

## Appendix 2: Country-specific regulations on patient's out-of-pocket payments.

|                                     | The Netherlands                                                                                                                                                                                                                                                                                       | France                                                                                                                                                                                                                                            | Belgium                                                                                                                                 |
|-------------------------------------|-------------------------------------------------------------------------------------------------------------------------------------------------------------------------------------------------------------------------------------------------------------------------------------------------------|---------------------------------------------------------------------------------------------------------------------------------------------------------------------------------------------------------------------------------------------------|-----------------------------------------------------------------------------------------------------------------------------------------|
| <b>Category of patient's costs</b>  | All first 46.46 Euro per year                                                                                                                                                                                                                                                                         |                                                                                                                                                                                                                                                   |                                                                                                                                         |
| Physicians visits                   | No contribution                                                                                                                                                                                                                                                                                       | Contribution 25% of official tariff                                                                                                                                                                                                               | Contribution of 30% of the tariff for GP-visit and 40% of specialist physician visit.                                                   |
| Social worker or rheumatology nurse | No contribution                                                                                                                                                                                                                                                                                       | No contribution                                                                                                                                                                                                                                   | No contribution                                                                                                                         |
| Physiotherapy                       | No contribution                                                                                                                                                                                                                                                                                       | Contribution 25 to 40% of official tariff, depending on the treatment provided                                                                                                                                                                    | Contribution 25 to 40% of official tariff, depending on the treatment provided                                                          |
| Alternative medicine                | No contribution if recognised physician                                                                                                                                                                                                                                                               | Contribution 25% of official tariff physician if provided by recognised physician                                                                                                                                                                 | Contribution 30% of official tariff physician if provided by recognised general physician                                               |
| Drugs                               | No contribution (for drugs used by patients in this observational study)                                                                                                                                                                                                                              | Contribution of 0%, 35% or 65% according to type of drug.                                                                                                                                                                                         | Contribution of 0%, 25% or 30% according to the type of drug with maximum per prescription.                                             |
| Technical procedures                | No contribution                                                                                                                                                                                                                                                                                       | Contribution 35% of official tariff                                                                                                                                                                                                               | From 10% up to 40% of official tariff                                                                                                   |
| Hospitalisation                     | 3.63 Euro per day                                                                                                                                                                                                                                                                                     | 6.10 Euro per day for hotel costs and 20% of general treatment costs but maximised to the first 30 days.                                                                                                                                          | 27 Euro per hospitalisation + 11.50 Euro per day for hotel costs + 0.62 Euro per day for drug costs                                     |
| Emergency department                | No contribution                                                                                                                                                                                                                                                                                       | See contribution of physician visit                                                                                                                                                                                                               | See contribution physician visit                                                                                                        |
| Rehabilitation clinic               | No contribution                                                                                                                                                                                                                                                                                       | 6.10 € per day                                                                                                                                                                                                                                    | Not applicable in study                                                                                                                 |
| Formal help                         | Patient contribution of 4.64 Euro/ hour with a maximum according to family income and family composition                                                                                                                                                                                              | Patient contribution per hour according to family income and family composition.                                                                                                                                                                  | Patient contribution per hour variable according to family income and family composition.                                               |
| Aids and appliances                 | Variable but only small contribution                                                                                                                                                                                                                                                                  | Reimbursement to 70 or 100% after approval from health insurance                                                                                                                                                                                  | Reimbursed at fixed amount if prescribed by specialist physician                                                                        |
| Adaptations at house                | After approval of community. Variable but usually no contribution.                                                                                                                                                                                                                                    | Reimbursed at variable amount after approval of community                                                                                                                                                                                         | Reimbursed at variable amount by special fund for chronic diseased.                                                                     |
| Spa treatment                       | All costs exceeding 464.64 Euro per 2 year.                                                                                                                                                                                                                                                           | All costs exceeding reimbursement which varies according to health insurance company.                                                                                                                                                             | Not reimbursed                                                                                                                          |
| <b>Non-medical patient costs</b>    |                                                                                                                                                                                                                                                                                                       |                                                                                                                                                                                                                                                   |                                                                                                                                         |
| Private household help              | Hourly wage Eurostat handworkster (11.00 Euro)                                                                                                                                                                                                                                                        | Hourly wage Eurostat handworkster (10.24 Euro)                                                                                                                                                                                                    | Hourly wage Eurostat handworkster (12.00 Euro)                                                                                          |
| Transport                           | Price per km based on mean gasoline and fuel market price. Reimbursement from health insurance company possible for visits to health care provider. Cheap public transport possible after approval from community. Invalid parking cart after approval from community free but parking costs not free | Price per m based on mean gasoline and fuel price. Reimbursement from health insurance company possible at fixed amount but following variable requirements. Parking cart or "carte debout pénible" possible but no exemption from parking costs. | Mean gasoline and fuel price. No reimbursement for AS-patients. Parking cart possible after approval but no exemption of parking costs. |
| Contributions                       | Home-help organisation 22.50 Euro/year. Limited contribution to AS society 81.81 Euro/year                                                                                                                                                                                                            | 25 € per year                                                                                                                                                                                                                                     | 12.5 € per year                                                                                                                         |
| Swim- & exercise-group              | Usually within the extended contribution to patient AS society (225 Euro/year)                                                                                                                                                                                                                        | Swimming or exercising at patient reported cost (market price)                                                                                                                                                                                    | Swimming or exercising at patient reported cost (market price)                                                                          |
